# Supplementary material
Source: PubMed Central journal article supplement (PMC7357625)
Supplement: NIHMS1599164-supplement-Primer_List.pdf [file NIHMS1599164-supplement-Primer_List.pdf]

| Number | Gene                                         | Forward Primer Sequence | Reverse Primer Sequence |
|--------|----------------------------------------------|-------------------------|-------------------------|
| P1     | <i>Cdkn2a</i> ( <i>p16<sup>INK4a</sup></i> ) | GAACTCTTTTCGGTCGTACCC   | AGTTCTGAATCTGCACCCGTAGT |
| P2     | <i>Cdkn1a</i> ( <i>p21</i> )                 | GAACATCTCAGGGCCGAAAA    | TGCGCTTGGAGTGATAGAAATC  |
| P3     | <i>Cdkn1b</i> ( <i>p27</i> )                 | TCCGCTGCAGAAATCTCTT     | CCAAGTCCCGGGTTAGTTCTT   |
| P4     | <i>Cdkn2b</i> ( <i>p15</i> )                 | AGATCCCAACGCCCTGAAC     | CCCATCATCATGACCTGGATT   |
| P5     | <i>Cdkn2d</i> ( <i>p19</i> )                 | GCGATAAGAGAGGGCCATAGC   | CCTGTGGTGGAGATCAGATTCA  |
| P6     | <i>Ccl1</i>                                  | GACCAGGTTGGGCAAAGAGA    | GGCATCCTGGACCCACTTCT    |
| P7     | <i>Ccl2</i>                                  | GTCTGTGCTGACCCCAAGAAG   | TGGTTCGATCCAGGTTTTTA    |
| P8     | <i>Ccl3</i>                                  | TCCCAGCCAGGTGTCATTTT    | TTGGAGTCAGCGCAGATCTG    |
| P9     | <i>Ccl4</i>                                  | AGGGTTCTCAGCACCAATGG    | CCGGGAGGTGTAAGAGAAACAG  |
| P10    | <i>Ccl5</i>                                  | GCCCACGTCAAGGAGTATTTCT  | ACAAACACGACTGCAAGATTGG  |
| P11    | <i>Ccl6</i>                                  | GATCGTCGCTATAACCCCTCAA  | TGGGATCTGTGTGGCATAAGAG  |
| P12    | <i>Ccl7</i>                                  | CCCTGGGAAGCTGTTATCTTCA  | CTGATGGGCTTCAGCACAGA    |
| P13    | <i>Ccl8</i>                                  | CCACACAGAAGTGGGTCAGTGA  | TTCAAGGCTGCAGAATTTGAGA  |
| P14    | <i>Ccl9</i>                                  | GGCCGGGCATCATCTTTATC    | TGCATCTCTGAACTCTCCGATCA |
| P15    | <i>Ccl11</i>                                 | GACCAGGTTGGGCAAAGAGA    | GGCATCCTGGACCCACTTCT    |
| P16    | <i>Csf1</i>                                  | ATTGCCAAGGAGGTGTCAGAA   | GGACCTTCAGGTGTCCATTCC   |
| P17    | <i>Cxcl1</i>                                 | CCGAAGTCATAGCCACACTCAA  | CAAGGGAGCTTCAGGGTCAAG   |
| P18    | <i>Cxcl2</i>                                 | TCAAGGGCGGTCAAAAAGTT    | CAGTTAGCCTTGCCTTTGTTCA  |
| P19    | <i>Cxcl5</i>                                 | GAGCTGCGTTGTGTTTGCTTAA  | CAGGGATCACCTCCAAATTAGC  |
| P20    | <i>Cxcl9</i>                                 | AACTCAGCTCTGCCATGAAGT   | AACTGCTCCAGGAAGATGAT    |
| P21    | <i>Cxcl10</i>                                | TGAATCCGGAATCTAAGACCA   | TTTTTGCTAAACGCTTTTCAT   |
| P22    | <i>Cxcl12</i>                                | GCCAACGTCAAGCATCTGAAA   | CAGCCGTGCAACAATCTGAA    |
| P23    | <i>Cxcl13</i>                                | AGCACAGCAACGCTGCTTCT    | AATACCGTGGCCTGGAGAGA    |
| P24    | <i>Cxcl16</i>                                | GCACCCCTGCACATAGTCAGA   | AGGACAGTGCTCCTGATGGAA   |
| P25    | <i>Cxcr4</i>                                 | CTGGACCGGTACCTCGCTATT   | GCAGTTTCCTTGGCCTCTGA    |
| P26    | <i>Cxcr5</i>                                 | CCTTCGCTGGCGTAAAGTTC    | ACAGCCCAGCTTGGTCAGAA    |
| P27    | <i>Cxcr6</i>                                 | TGGGAGTCTCAAGTCAATGGAA  | TGTGGGAGGCAGAACAAAGTCT  |
| P28    | <i>Cxcr7</i>                                 | TGTGCTCTTTACAGCGTTGCAT  | TTGACACAGCAGTGCACCAA    |
| P29    | <i>Icam1</i>                                 | GTGGCGGGAAAGTTCCTGTT    | GTCCAGCCGAGGACCATACA    |
| P30    | <i>Igfbp4</i>                                | GCAACTTCCACCCCAAACAGT   | CCTGTCTTCCGATCCACACA    |
| P31    | <i>Il1a</i>                                  | AAGAGACCATCCAACCCAGATC  | CCTGACGAGCTTCATCAGTTTG  |
| P32    | <i>Il1b</i>                                  | TCAGGCAGGCAGTATCACTCA   | CACGGGAAAGACACAGGTAGCT  |
| P33    | <i>Il-1rn</i>                                | CCACCACCAGCTTTGAGTCA    | ACGGTCAGCCTCTAGTGTGTG   |
| P34    | <i>Il6</i>                                   | ACCACGGCCTTCCCTACTTC    | TTGGGAGTGGTATCCTCTGTGA  |
| P35    | <i>Il10</i>                                  | TGGCTCAGCACTGCTATGCT    | TGTAAGTGGCCCTGCTGATC    |
| P36    | <i>Il11</i>                                  | GCTCCCCTCGAGTCTTTCAG    | GGGATCGGGTTAGGAGAACAG   |
| P37    | <i>Il12a</i>                                 | ATCCTGCTTACGCCTTCAG     | GATAGCCCATCACCCCTGTTGA  |
| P38    | <i>Il12b</i>                                 | GCCAGTACACCTGCCACAAAG   | TGTGGAGCAGCAGATGTGAGT   |
| P39    | <i>Il15</i>                                  | GGCATTTCATGTCTTCATTTTGG | TCCAGTTGGCCTCTGTTTTAGG  |
| P40    | <i>Il18</i>                                  | GGCTGTGACCCTCTCTGTGAA   | AGGTGGATCCATTTCTCAAAG   |

|     |                 |                         |                         |
|-----|-----------------|-------------------------|-------------------------|
| P41 | <i>Lyn</i>      | AGCACAAAGGTGGCTGTGAAG   | GGAATGCCTGCACAGACATG    |
| P42 | <i>Mif</i>      | GCCACCATGCCTATGTTTCATC  | GGGTGAGCTCCGACAGAAAC    |
| P43 | <i>Mmp2</i>     | TGTGGGTGGAAATTCAGAAGGT  | ACTTGTTGCCCAGGAAAGTGA   |
| P44 | <i>Mmp12</i>    | GTGCCCCGATGTACAGCATCTT  | GGTACCGCTTCATCCATCTTG   |
| P45 | <i>Mmp13</i>    | TGAGGAAGACCTTGTGTTTGCA  | GCAAGAGTCGCAGGATGGTAGT  |
| P46 | <i>Nfkb1</i>    | GGCTTTGCAAACCTGGGAAT    | TCCGTGCTTCCAGTGTTTCA    |
| P47 | <i>Pf4</i>      | TGGGATCCATCTTAAGCACATCA | CCATTCTTCAGGGTGGCTATGAG |
| P48 | <i>Serpinb2</i> | TTCCGCATACTGGAAACATCAG  | GGATGCGTCCTCAATCTCATC   |
| P49 | <i>Serpine1</i> | GGACACCCTCAGCATGTTCA    | CGGAGAGGTGCACATCTTTCT   |
| P50 | <i>Tnfsf10</i>  | CTCTCGGAAAGGGCATTTCATT  | TCGATGACCAGCTCTCCATTC   |
| P51 | <i>Vcam1</i>    | GGCTCCAGACATTTACCCAGTT  | CATGAGCTGGTCACCCTTGAA   |
| P52 | <i>Actb</i>     | AATCGTGCGTGACATCAAAGAG  | GCCATCTCCTGCTCGAAGTC    |
| P53 | <i>Tuba1</i>    | GGTCCCAAAGATGTCAATGCT   | CAAACCTGGATGGTACGCTTGGT |
